# Supplementary material for: Adipokine chemerin overexpression in trophoblasts leads to dyslipidemia in pregnant mice: implications for preeclampsia
Source: PubMed Central journal article supplement (PMC9875463; doi:10.1186/s12944-023-01777-4), 2023-01-25
Supplement: 12944_2023_1777_MOESM3_ESM.pdf [file 12944_2023_1777_MOESM3_ESM.pdf]

1 **Abstract**

2 **Background:** Adipokine chemerin regulates adipogenesis and the metabolic function of both  
3 adipocytes and liver which is elevated in circulation and placenta in preeclamptic women. Our  
4 previous research reported that overexpression of chemerin in placental trophoblasts  
5 induced preeclampsia-like symptoms in mice. Preeclampsia is known to be accompanied by  
6 dyslipidemia, albeit via unknown mechanisms. Herein, we hypothesized that chemerin might  
7 be a potential biomarker of dyslipidemia.

8 **Methods:** Circulating lipid markers including cholesterol, triglycerides, high-density  
9 lipoprotein cholesterol (HDL-C), lysophosphatidic acid, and low-density lipoprotein  
10 cholesterol (LDL-C) were detected in the preeclampsia-like mouse with chemerin  
11 overexpression in placental trophoblasts. Histomorphology and lipid accumulation in  
12 placenta were also detected by using hematoxylin and eosin staining, paraphenylenediamine  
13 staining as well Oil Red O staining. Expressions of lipid metabolism related genes and proteins  
14 were detected in placenta and the chemerin-overexpressed human trophoblasts. In addition,  
15 phospholipidomics analysis was performed to detect phospholipid levels in chemerin-  
16 overexpressed trophoblasts.

17 **Results:** Overexpression of chemerin in trophoblast increased the circulating and placental  
18 levels of cholesterol rather than triglycerides. It also increased the seral levels of  
19 lysophosphatidic acid, HDL-C, and LDL-C, and induced placental lipid accumulation.  
20 Mechanistically, chemerin upregulated the levels of peroxisome proliferator-activated  
21 receptor  $\gamma$ , fatty acid-binding protein 4, adiponectin, sterol regulatory element-binding  
22 protein 1 and 2, and the ratio of phosphorylated extracellular signal-regulated protein kinase  
23 (ERK)/total ERK in the placenta of mice and human trophoblasts. Furthermore, chemerin

24 overexpression in human trophoblasts increased the production of lysophospholipids and  
25 phospholipids, particularly lysophosphatidylethanolamine.

26 **Conclusions:** Overexpression of placental chemerin production disrupts trophoblast lipid  
27 metabolism via the CMKLR1/CCRL2 axis, thereby potentially contributing to dyslipidemia in  
28 preeclampsia.

29 **Keywords:** chemerin; preeclampsia; dyslipidemia; placenta; trophoblast; phospholipids

30 **Background**

31 Preeclampsia is a progressive, multi-systemic disorder which causes a high prevalence of  
32 pregnancy-related morbidity and mortality [1]. Clinically, preeclampsia appears after 20  
33 weeks of gestation with de novo hypertension and either proteinuria<sup>4</sup> or hemolysis, elevated  
34 liver enzymes and low platelets (HELLP) syndrome [2, 3]. The exact pathophysiology is still  
35 unknown. Increasing evidence reveals an association between this pathological condition and  
36 an imbalance in lipid regulation. Previous studies revealed that preeclamptic patients have a  
37 higher seral<sup>14</sup> level of triglycerides, total cholesterol, phospholipids and low-density lipoprotein  
38 cholesterol (LDL-C) [4-9].

39 Chemerin, a small chemotactic adipokine, affects blood pressure, cholesterol levels,  
40 adipose tissue functions, and insulin sensitivity [10]. It functions through three receptors, C-  
41 C motif chemokine receptor-like 2 (CCRL2), chemerin receptor 1 (CMKLR1), chemerin  
42 receptor 2 (GPR1) [11, 12]. Blood chemerin levels are elevated in preeclampsia patients and  
43 correlate positively with preeclampsia severity [4, 13-15]. Our previous work, we developed  
44 a preeclampsia-like mouse model which was induced by specific overexpression of chemerin  
45 in placental trophoblasts. Severe placental vascular damage, significant embryonic growth  
46 restriction and lethality were observed in this animal model [16]. The data indicates that  
47 chemerin originates, at least partially, from placenta during pregnancy in mice.

48 We hypothesized that a high level of chemerin released from placental trophoblasts might  
49 be a risk factor contributing to dyslipidemia during preeclamptic conditions. In the current  
50 study, we further investigated lipid accumulation in placenta tissues in this mouse model, and  
51 phospholipid profile was also explored in chemerin-overexpressed human trophoblast cells.

52 **Materials and Methods**

53 **Production of lentiviral vectors**

54 The construction of lentiviral vectors and the chemerin overexpression model has been  
55 described in our previous work [16]. In brief, LV-mChemerin-GFP and LV-hChemerin-GFP were  
56 generated by cloning mouse chemerin or human chemerin into the lenti-viral vector  
57 respectively (LV-GFP, System Biosciences, USA). The method for producing lentiviral particles  
58 was previously described [16-18]. The titer of lentivirus was measured by using a comercial  
59 kit (Cell Biolabs Inc, San Diego, CA, USA).

60 **Preparation of preeclampsia mice model**

61 Animal experiments were conducted at the Shenzhen Institutes of Advanced Technology in  
62 compliance with the Chinese Academy of Sciences board approval. CD-1 mice at the age of 8-  
63 10 weeks were purchased from Beijing Vital River Laboratory Animal Technology Co., Ltd.  
64 (Beijing, China). The procedures for generating the preeclampsia mouse model were  
65 previously described [16-18]. The vaginal plug day was marked as the first day of pregnancy  
66 or pseudopregnancy (gestational day 1; GD1). On GD4, zona-free blastocysts were transferred  
67 to GD3 pseudopregnant mice after 6 h-incubation with LV-mChemerin-GFP (Chemerin) or LV-  
68 GFP (Control). Placentas and blood samples were collected. On GD15 and GD18, mice were  
69 anaesthetied with 5% isoflurane administration and cervical dislocation. Placentas were  
70 collected for histopathological diagnosis as well as mRNA and protein analyses. Serum  
71 samples were prepared for biochemical tests.

72 **Biochemical measurements**

73 On GD18, bloods were sampled from the mouse tail for fasting blood glucose measurement  
74 by a glucose meter (Roche, Basel, Switzerland). The serum lipids levels (included triglyceride,  
75 high-density lipoprotein cholesterol (HDL-C), cholesterol, and low-density lipoprotein

76 cholesterol (LDL-C) were determined using an automatic biochemical analyzer (Roche, Basel,  
77 Switzerland). Placental triglycerides and cholesterol were extracted by Folch's method [19].  
78 ELISA kits were utilized to detect seral levels of lysophosphatidic acid (LPA, BLUEFBIO,  
79 Shanghai, China) and chemerin (R&D Systems, Minneapolis, MN, USA) respectively.

## 80 **Histology**

81 Mouse placentas were incubated in 4% paraformaldehyde (PFA) for 24 hours at four  
82 degrees Celsius, followed by embedding with paraffin or O.C.T. solution (Sakura, Torrance,  
83 CA, USA).

84 *Oil Red O staining.* Frozen sections of the placenta, 10 µm thick, were fixed in 4% PFA and  
85 dehydrated in a gradient of sucrose. Sections were tained in Oil Red O staining solution  
86 according to manufacturer's instructions (Sigma-Aldrich).

87 *Hematoxylin & eosin (H&E) staining.* Five µm thick paraffin slices were obtained. Slides  
88 were deparaffinized, and rehydrated, then stained by H&E.

89 *Phospholipids staining.* After fixation and dehydration, placental frozen sections were  
90 stained by paraphenylenediamine (PPD) staining method as described previously [20]. Briefly,  
91 1% PPD (Aladdin, Shanghai, China) was added, and incubated the slides for 10 minutes at  
92 20 °C , then rinsed in 100% ethanol for 5 min. Sections were dried and covered with mounting  
93 solution.

94 The images of statining were captured by an Olympus BX53 microscope (Olympus, Japan).

## 95 **Preparation of chemerin-overexpressed trophoblast cell model**

96 The HTR-8/SVneo cells were kept in DMEM/F12 medium with 10% fetal bovine serum  
97 (Hyclone, Logan, UT, USA) at 37°C with 5% CO<sub>2</sub>, which was received from Dr. Charles H.

98 Graham at Queen's University. Preparation of the chemerin-overexpressed cells has been  
99 described previously [16]. Lipid accumulation was measured in the cells by Oil Red O staining.

#### 100 **Gene expression analysis**

101 First, RNA was extracted from the control and chemerin groups in mouse placenta and  
102 trophoblast cells using TRIzol<sup>®</sup> reagent (Invitrogen, Carlsbad, CA). Then, a commercial kit  
103 (Invitrogen) used to reverse transcript RNA to DNA templates. Finally, the <sup>12</sup>real-time PCR was  
104 performed using an SYBR green-based qPCR kit (TOYOBO, Osaka, Japan) and run on the  
105 System (Roche, Pleasanton, CA, USA). Sequences of the specific primers are displayed in the  
106 **Supplementary Table 1**. The comparative C(T) method was used to determine the mRNA  
107 levels of genes which were normalised by using <sup>18</sup> $\beta$ -actin as an internal reference gene.

#### 108 **Western blot**

109 The total proteins of the samples from the control and chemerin groups in mouse placenta  
110 and trophoblast cells were extracted from the placental homogenates using RIPA lysis buffer,  
111 and quantified using the Bradford method (<sup>10</sup>Thermo Fisher Scientific, Waltham, MA, USA). A  
112 total of 20  $\mu$ g protein of each sample were electroblotted onto PVDF membranes (Millipore,  
113 Burlington, MA) after SDS-PAGE separation. The following method has been described  
114 previously [16]. Protein signals were developed using an enhanced chemiluminescence kit  
115 and observed with a ChemiDoc system (Bio-Rad, Irvine, CA). The primary antibodies and  
116 dilutions are listed as following: rabbit polyclonal antibodies against adiponectin (1:500,  
117 Proteintech, Wuhan, China), FABP4 (1:1000, Abcam, Cambridge, UK), PPAR $\gamma$  (1:1000, Cell  
118 Signaling Technology, Boston, MA, USA), ACC (1:1000, Cell Signaling), ERK1/2 (1:1000, Cell  
119 Signaling), phospho-ERK1/2 (1:1000, Cell Signaling), LDLR (1:1000, Thermo Fisher), mouse  
120 monoclonal antibodies against SREBP2 and SREBP1 (1:1000, Santa Cruz Biotechnology, Santa

121 Cruz, CA, USA),  $\beta$ -actin (1:5000, Sigma-Aldrich) and SORT1 (1:1000, BD Bioscience, Ann Arbor,  
122 MI, USA).

### 123 **Phospholipidomics analysis in chemerin-overexpressed cell model**

124 <sup>13</sup> *Lipid extraction.* Intracellular lipids were extracted by methyl-tert-butyl ether (MTBE) method  
125 [21, 22]. The chemerin-overexpressed and control trophoblast cells (3 pooled batches of cells  
126 per sample) were first resuspended in 1.5 mL methanol. Then MTBE (5 mL) was added, and  
127 the mixtures were vortexed for 1 h at 20°C and culured in water (1.25 mL) for 10 min. After  
128 centrifugation, the upper organic lipid phases were collected and dried in a vacuum centrifuge.  
129 Then, lipids were dissolved in CHCl<sub>3</sub>/methanol/water (200  $\mu$ L, 60:30:4.5 by volumn) followed  
130 by phospholipidomics analysis.

131 *Phospholipids metabolomic analysis.* 150  $\mu$ L of each lipid fraction was mixture with a 1650  
132  $\mu$ L of chloroform/methanol/ammonium acetate (300:665:35 by volumn). Phospholipid  
133 classes were identified by electrospray ionisation tandem mass spectrometry, and quantified  
134 via using the internal standards [23], including 6.6 nmol di-14:0-phosphatidylcholine (PC), 6.6  
135 nmol 13:0- lysophosphatidylcholine (LPC), 6.6 nmol 19:0-LPC, 3.6 nmol di-14:0-  
136 phosphatidylethanolamine (PE), 3.6 nmol 14:0-lysophosphatidylethanolamine (LPE), 3.6 nmol  
137 18:0-LPE, 3.6 nmol di-14:0- phosphatidylglycerol (PG), 3.6 nmol 14:0-  
138 lysophosphatidylglycerol (LPG), 3.6 nmol 18:0-LPG, 3.6 nmol di14:0- phosphatidic acid (PA),  
139 2.4 nmol di14:0- phosphatidylserine (PS), and 1.63 nmol di18:0- phosphatidylinositol (PI). The  
140 Shimadzu UFLC LC/MS system (Triple TOFTM 5600 plus; AB Sciex, Foster City, CA) combined  
141 with a C18 column (Kinetex 2.6 $\mu$  C18 100A 150 x 2.1 mm00F-4462-AN) was used for the  
142 analysis and identification of the lipid components. The mass spectrometry conditions were:  
143 ion source temperature, 300°C; electrospray voltage, +5.5 kV or -4.5 kV; positive ion mode,

144 collision voltage (CE), PE and LPE, +28 V; PC and LPC, +40 V; negative ion mode, collision  
145 voltage (CE), PI, -58 V; PG, LPG and PA, -57 V; PS, -34 V. The data were analyzed qualitatively  
146 using Peakview, a companion software provided by AB Sciex, and then quantitatively using  
147 MultiQuant software.

#### 148 **Statistical analysis**

149 The data represent as mean  $\pm$  SD. GraphPad Prism was used for statistical analysis (version 8,  
150 La Jolla, CA, USA). The data normality was evaluated by the Shapiro-Wilk test. Statistic  
151 difference between groups was analyzed by using the Student's t-test, indicating as  $*P < 0.05$   
152 and  $**P < 0.01$ .

#### 153 **Results**

##### 154 **Overexpression of chemerin in trophoblast increased lipid levels in mice**

155 The specific overexpression of chemerin was firstly verified in trophoblasts. As shown in  
156 Supplementary Fig. 1, GFP signals were observed in blastocyst trophectoderm and placentas  
157 of the control or chemerin group mouse on GD18 (Supplementary Fig. 1A), and no GFP signals  
158 were detected in the fetus (Supplementary Fig. 1B). The expression of either chemerin mRNA  
159 or protein was increased in the chemerin group's placentas (Supplementary Fig. 1C and D).  
160 Furthermore, circulating chemerin level was remarkably higher in the chemerin group than in  
161 the control group (Supplementary Fig. 1E).

162 There was no difference in maternal body weight, fasting blood glucose, or placental  
163 weight between the control and chemerin groups on GD18 (Fig. 1A-C). Serum cholesterol  
164 level was increased in the chemerin-overexpressed mice (Fig. 1D), while the triglyceride level  
165 showed no significant change (Fig. 1E). Biochemical measurements also revealed that serum



166 HDL-C, LDL-C and LPA were higher in the chemerin-overexpressed group than those in the  
167 control mice (Fig. 1F-H).

#### 168 **Overexpression of chemerin in trophoblast induced lipid accumulation in mouse placenta**

169 As shown in Fig. 2A, the placental layers were disorganized in mice with chemerin-  
170 overexpression in trophoblasts, and the majority of trophoblasts were distributed in the  
171 labyrinth and junctional zones. Lipid accumulation was observed in the junctional zone and  
172 labyrinth of the mouse placenta by Oil Red O staining, which was increased in mice of the  
173 chemerin group (Fig. 2B). The phospholipids, the primary initial source of LPA, were  
174 assessed in the placenta by PPD staining. The phospholipid signals were mainly located in  
175 the junctional zone and labyrinth, however staining signals in the labyrinth was stronger  
176 than that in the junctional zone when the chemerin was specifically overexpressed in mouse  
177 placentas (Fig. 2C). Furthermore, overexpression of chemerin increased levels of triglyceride  
178 (Fig. 2D) and cholesterol in the placenta (Fig. 2E).

#### 179 **Overexpression of chemerin in trophoblast increased the expression of lipid-related 180 proteins through CMKLR1/CCRL2 axis**

181 CMKLR1, GPR1 and CCRL2 are three chemerin receptors. The mRNA expression of CMKLR1 and  
182 CCRL2, but not GPR1 showed a significant increase in the placentas of mice with chemerin-  
183 overexpression (Fig. 3A-C). Notably, the expression of lipid-related genes *Pparg*, *Fabp4*, and  
184 *Srebp2* was also increased in the chemerin over-expressed placentas (Fig. 3D). The protein  
185 levels showed a similar increase (Fig. 3E and F). Furthermore, the protein levels of adiponectin,  
186 SREBP1 and the p-ERK/total ERK ratio were increased in the chemerin group's placenta (Fig.  
187 3E and F). However, the protein levels of LDLR showed no significant change between the  
188 control and chemerin groups (Fig. 3E and F).

189 Accumulation of the lipid droplets in HTR-8/SVneo cells increased after the cells were  
190 induced a high level of chemerin (Fig. 4A). Chemerin overexpression increased the mRNA and  
191 protein levels of PPAR $\alpha$ , FABP4, and SREBP2, as well as the protein level of ACC (Fig. 4B-F).  
192 Similar to the alterations observed in the chemerin-overexpressing placenta *in vivo*,  
193 adiponectin and SREBP1 protein levels and the p-ERK/total ERK ratio were increased (Fig. 4E  
194 and F). However, in the chemerin group, the protein levels of LDLR and its related protein  
195 SORT1 decreased (Fig. 4E and F).

#### 196 **Overexpression of chemerin in trophoblast leads to increased production of** 197 **lysophospholipids and phospholipids**

198 The results of phospholipidomics in HTR-8/SVneo cells revealed that the chemerin group  
199 produced significantly more lysophospholipids, specifically LPC, LPE, and LPG (Fig. 5A).  
200 Additionally, PA decreased while PC, PE, PG, PI, and PS were all increased in the chemerin  
201 group (Fig. 5A). More specifically, the levels of LPC species (16:1, 18:0 and 18:3), LPE species  
202 (16:0, 18:1, 18:2 and 18:3), and LPG 18:1 were increased in the chemerin group (Fig. 5B).  
203 Levels, PS species (34:1, 34:2, 36:1, 36:2, 36:3, 38:2, 38:3, 40:2, 40:3 and 40:4) were increased  
204 in the chemerin group (Fig. 5C). Levels of PC species (32:0, 34:2, 34:3, 36:1, 36:2, 36:3, 36:4,  
205 36:5, 38:2, 38:3, 38:4, and 38:6) were increased in the chemerin group (Fig. 5D). Levels of PE  
206 species (32:1, 34:1, 34:2, 36:1, 36:2, 36:3, 36:4, 38:3, 38:5 and 38:6) were increased in the  
207 chemerin group (Fig. 5E). Levels of PI species (32:2, 32:3, 34:1, 34:2, 36:1, 36:2 and 36:3) were  
208 increased in the chemerin group (Fig. 5F). Levels of PA species (34:6 and 36:2) and PG species  
209 (32:1, 34:1, 34:2, 34:3, 34:4, 36:1, 36:2 and 36:3) were increased in the chemerin group (Fig.  
210 5F).

#### 211 **Discussion**

212 The present finding disclosed that specific over-expression of chemerin in trophoblast-  
213 elevated the lipid levels in the mouse maternal serum and a placental lipid accumulation.  
214 Overexpression of chemerin also facilitated lipid accumulation in the human trophoblastic  
215 HTR-8/SVneo cells. Our previous research has reported that specific overexpression of  
216 chemerin in trophoblasts causes preeclampsia-like symptoms, and more chemerin is released  
217 in human preeclamptic placentas compared to the normal placentas [16]. The data suggest  
218 that elevated chemerin release in placenta might underlie the dyslipidemia occurring in  
219 preeclamptic patients, particularly in severe cases [4-8, 13-15].

220 Chemerin was initially discovered in adipocytes and liver, and associated with obesity,  
221 metabolic disorders, and cardiovascular disease [10-13, 15, 24, 25], with high levels in obese  
222 rodents and humans [24, 26, 27]. Chemerin promotes adipogenesis. Adipocyte differentiation  
223 and adipose tissue expansion were impaired when reducing chemerin level or blocking its  
224 receptor CMKLR1 [26, 28]. Elevated expression of CMKLR1 and CCRL2 in the specific  
225 chemerin-overexpressed trophoblasts suggests that these receptors are involved in the  
226 promotional effect of chemerin on lipid accumulation during pregnancy. The lipid elevation is  
227 associated with cholesterol rather than triglyceride, although the latter correlates positively  
228 with chemerin in metabolic disorders [29, 30].

229 It is well known that chemerin stimulates lipid accumulation in multiple cells, including 3T3-  
230 L1 cells and HepG2 cells [31, 32]. Investigations both *in vivo* and *in vitro* have shown that  
231 chemerin improved the lipid uptake and storage, evidenced by the enhanced production of  
232 PPAR $\gamma$  [33], adiponectin [34], p-ERK1/2 [35-37], and FABP4 [38]. Chemerin increased  
233 cholesterol biosynthesis by upregulation of SREBP2 [39], and diminished LDL endocytosis via  
234 downregulating both the LDLR and SORT1 in HTR-8/SVneo trophoblast cells [40, 41], which  
235 subsequently reduced the LDL uptake and increased the cholesterol release. Moreover,

236 chemerin overexpression potentially improved the tricarboxylic acid (TCA) cycle and fatty acid  
237 synthesis by increasing ACC and SREBP1 [42, 43], which further enhanced the lipid deposition.

238 Pregnancy diseases, such pre-eclampsia, are coupled with lipid metabolic dysregulation,  
239 which is manifested by <sup>2</sup>increase in maternal plasma lipid levels. The content of total  
240 phospholipid, individual phospholipid classes as well the cholesterol were increased in pre-  
241 eclamptic placental tissues [44, 45]. The maternal blood lipidome may be involved in the  
242 pathophysiology of severe preeclampsia and act as a biomarkers [8]. Oxidation products (e.g.,  
243 oxLDL) derived from cholesterol and lysophospholipids contribute to the pathogenesis of  
244 preeclampsia and cause oxidative stress, eNOS dysfunction, endothelial dysfunction, and  
245 acute atherosclerosis [46]. Normal HDL has been described as an atheroprotective particle,  
246 but in patients with cardiovascular disease, HDL can be converted to a dysfunctional form and  
247 even exhibit proatherogenic effects [47]. Dysfunctional HDL is characterized by oxidized  
248 phospholipids and lysophospholipids, thereby losing its ability to promote cholesterol efflux  
249 and prevent LDL oxidation [48]. In this study, we found that chemerin overexpression  
250 increased the levels of phospholipids, lysophospholipids, and cholesterol in maternal blood  
251 and the placenta, while these materials accumulated in the labyrinth layer. The  
252 phospholipidomic findings demonstrated that high level of chemerin in human trophoblasts  
253 enhanced the contents of lysophospholipid molecular species of LPC 16:1 and18:2, and  
254 LPE18:2. Similar changes have been reported in blood of the preeclamptic women [8, 49].  
255 Additionally, chemerin overexpression enhanced LPC 16:0, PE 34:2, and PE 34:3 levels, which  
256 also occur in preeclamptic placentas [50].

257 In preeclampsia condition, high level of chemerin is released from trophoblasts in the  
258 placenta, which increases the content of placental lipids (triglycerides, cholesterol, and  
259 phospholipids), lipid droplet accumulation, the TCA cycle and abnormal HDL through

260 CMKLR1/CCRL2 axis. Meanwhile, chemerin inhibits LDL uptake by reducing LDLR and SORT1  
261 in trophoblasts, which leads to an increase in the release of lipids and the lipid-related protein  
262 (triglycerides, cholesterol, phospholipids, and chemerin) from the placenta to maternal  
263 circulation, as well as a lower LDL uptake from circulation to placenta, eventually resulting in  
264 dyslipidemia in the patient (Fig. 6).

265 **Comparisons with other studies and what does the current work add to the existing**  
266 **knowledge**

267 Many studies studied the changes of lipids in the circulation and placenta via comparison the  
268 healthy control with preeclampsia, but few of them focused on the mechanism underlying  
269 the dyslipidemia in preeclampsia. It is known that chemerin play important roles in lipid  
270 metabolism of adipocytes and hepatocytes. However, its effects on lipid accumulation in  
271 preeclamptic placenta has not been studied. Herein, the present study uses the preeclampsia-  
272 like mouse model induced by chemerin and chemerin-overexpressed human trophoblasts to  
273 validate its multiple roles in preeclampsia, which is helpful in suggesting chemerin as a  
274 potential target in clinical therapy.

275 **Study strength and limitations**

276 In our previous work, we developed a preeclampsia-like mouse model by specifically  
277 overexpressing chemerin in placenta. The present study disclosed a high level lipid in  
278 circulation and the local lipid accumulation in junctional zone and labyrinth in the placenta in  
279 this animal model, as well the alteration of phospholipids in the chemerin over-expressing  
280 human placental trphoblasts cells. The data give insight into pathogenesis of dyslipidemia  
281 during pregnancy which may be associated with lipid metabolism dysfunction in placenta.  
282 However, it is difficult to mediate precisely the expression of chemerin via the lentiviral

283 system. Due to a lack of samples, phospholipid profile in placenta was not analyzed. In  
284 addition, increasing HDL-C levels in the preeclampsia-like mice also need to be explored.

285

286 **Conclusions**

287 In conclusion, this study suggests that chemerin disturbs trophoblast lipid metabolism by  
288 increasing lipid uptake, lipid droplet deposition, cholesterol biosynthesis, and by inhibiting  
289 LDL endocytosis and the TCA cycle, possibly via the CMKLR1/CCRL2 axis. A lipidome analysis  
290 in human placentas with high expression of chemerin may help to rich the roles of chemerin  
291 in pathogenesis of preeclampsia.

292

---

ORIGINALITY REPORT

---

8%

SIMILARITY INDEX

5%

INTERNET SOURCES

5%

PUBLICATIONS

1%

STUDENT PAPERS

---

PRIMARY SOURCES

---

1

[link.springer.com](https://link.springer.com)

Internet Source

1%

---

2

[www.researchgate.net](https://www.researchgate.net)

Internet Source

1%

---

3

Sandeep Hans, Zeeshan Fatima, Saif Hameed.  
" Mass spectrometry based untargeted  
lipidomics reveals new compositional insights  
into membrane dynamics of under  
magnesium deprivation ", Journal of Applied  
Microbiology, 2021

Publication

1%

---

4

[www.science.gov](https://www.science.gov)

Internet Source

1%

---

5

Hemin Jiang, Yuwei Liu, Yu Qian, Ziyang Shen,  
Yunqiang He, Rui Gao, Min Shen, Shu Chen, Qi  
Fu, Tao Yang. "CHL1 promotes insulin  
secretion and negatively regulates the  
proliferation of pancreatic  $\beta$  cells",  
Biochemical and Biophysical Research  
Communications, 2020

Publication

1%

---

|    |                                                                                                                                                                                                                                                                                |      |
|----|--------------------------------------------------------------------------------------------------------------------------------------------------------------------------------------------------------------------------------------------------------------------------------|------|
| 6  | Wei Li, Fengxiao Zhang, Chenhui Ju, Suying Lv, Kai Huang. "The role of CD27-CD70 signaling in myocardial infarction and cardiac remodeling", International Journal of Cardiology, 2018<br>Publication                                                                          | <1 % |
| 7  | docksci.com<br>Internet Source                                                                                                                                                                                                                                                 | <1 % |
| 8  | repository.ajou.ac.kr<br>Internet Source                                                                                                                                                                                                                                       | <1 % |
| 9  | Stergios S. Bibis, Kelly Dahlstrom, Tongtong Zhu, Rachel Zufferey. "Characterization of Leishmania major phosphatidylethanolamine methyltransferases LmjPEM1 and LmjPEM2 and their inhibition by choline analogs", Molecular and Biochemical Parasitology, 2014<br>Publication | <1 % |
| 10 | www.spandidos-publications.com<br>Internet Source                                                                                                                                                                                                                              | <1 % |
| 11 | Submitted to Facultad Latinoamericana de Ciencias Sociales (FLACSO) - Sede Ecuador<br>Student Paper                                                                                                                                                                            | <1 % |
| 12 | Kim, S.J.. "Defective cholesterol traffic and neuronal differentiation in neural stem cells of Niemann-Pick type C disease improved by valproic acid, a histone deacetylase inhibitor",                                                                                        | <1 % |



Biochemical and Biophysical Research  
Communications, 20070831

Publication

13

[ash.silverchair-cdn.com](http://ash.silverchair-cdn.com)

Internet Source

<1 %

14

[cellandbioscience.biomedcentral.com](http://cellandbioscience.biomedcentral.com)

Internet Source

<1 %

15

[mdpi.com](http://mdpi.com)

Internet Source

<1 %

16

[online.medunigraz.at](http://online.medunigraz.at)

Internet Source

<1 %

17

[www.mdpi.com](http://www.mdpi.com)

Internet Source

<1 %

18

[www.frontiersin.org](http://www.frontiersin.org)

Internet Source

<1 %

19

Ruth Welti, Weiqi Li, Maoyin Li, Yongming Sang, Homigol Biesiada, Han-E Zhou, C. B. Rajashekar, Todd D. Williams, Xuemin Wang. "Profiling Membrane Lipids in Plant Stress Responses", Journal of Biological Chemistry, 2002

Publication

<1 %

20

Wilson Rios-Munoz. "Fibroblast growth factor 2 applied to the optic nerve after axotomy increases Bcl-2 and decreases Bax in ganglion cells by activating the extracellular signal-

<1 %

# regulated kinase signaling pathway", Journal of Neurochemistry, 6/2005

Publication

---

---

Exclude quotes      On

Exclude matches      Off

Exclude bibliography      On
